1 **Workplace infection control measures and romantic activities of workers during**  
2 **COVID-19 pandemic: a prospective cohort study in Japan**

3  
4 Yoshihisa Fujino<sup>1</sup>, M.D. M.P.H, Ph.D., Makoto Okawara<sup>1</sup>, M.D., Ph.D., Ayako Hino<sup>2</sup>, M.D.,  
5 Ph.D., Keiji Muramatsu<sup>3</sup>, M.D., Ph.D., Tomohisa Nagata<sup>4</sup>, M.D., Ph.D., Kazunori Ikegami<sup>5</sup>,  
6 M.D., Ph.D., Seiichiro Tateishi<sup>6</sup>, M.D., Ph.D., Mayumi Tsuji<sup>7</sup>, M.D., Ph.D., and Tomohiro  
7 Ishimaru<sup>1</sup>, M.D., M.P.H., Ph.D., for the CORoNaWork project

8  
9  
10 **Author contributions:** Y.F. was the chairperson of the study group. Y.F. conceived the  
11 research questions. Y.F. conducted the statistical analysis and drafted the manuscript. All the  
12 authors designed the research protocol and developed the questionnaire. All the authors  
13 reviewed and approved the final manuscript.

14  
15 **Authors' affiliations:**

16 <sup>1</sup> Department of Environmental Epidemiology, Institute of Industrial Ecological Sciences,  
17 University of Occupational and Environmental Health, Japan, Kitakyushu, Japan

18 <sup>2</sup> Department of Mental Health, Institute of Industrial Ecological Sciences, University of  
19 Occupational and Environmental Health, Japan, Kitakyushu, Japan

20 <sup>3</sup> Department of Preventive Medicine and Community Health, School of Medicine, University  
21 of Occupational and Environmental Health, Japan, Kitakyushu, Japan

22 <sup>4</sup> Department of Occupational Health Practice and Management, Institute of Industrial  
23 Ecological Sciences, University of Occupational and Environmental Health, Japan, Kitakyushu,  
24 Japan

**NOTE: This preprint reports new research that has not been certified by peer review and should not be used to guide clinical practice.**

25 <sup>5</sup> Department of Work Systems and Health, Institute of Industrial Ecological Sciences,  
26 University of Occupational and Environmental Health, Japan, Kitakyushu, Japan

27 <sup>6</sup> Disaster Occupational Health Center, Institute of Industrial Ecological Sciences, University  
28 of Occupational and Environmental Health, Japan, Kitakyushu, Japan

29 <sup>7</sup> Department of Environmental Health, School of Medicine, University of Occupational and  
30 Environmental Health, Japan, Kitakyushu, Japan

31

32

33 **Corresponding author:** Yoshihisa Fujino<sup>1</sup>, M.D., M.P.H., Ph.D.

34 Department of Environmental Epidemiology, Institute of Industrial Ecological Sciences,  
35 University of Occupational and Environmental Health, Japan

36 1-1, Iseigaoka, Yahatanishiku, Kitakyushu, 807-8555, Japan

37 Tel: +81-93-691-7401

38 E-mail: [zenq@med.uoeh-u.ac.jp](mailto:zenq@med.uoeh-u.ac.jp)

39

40 **Abstract**

41 **Background:** Due to the COVID-19 pandemic, non-married people are at high risk of  
42 loneliness. With social interactions restricted, it is important for non-married people to  
43 acquire a new romantic partner for their mental health and quality of life. We hypothesized  
44 that infection control efforts in the workplace influence people's social interactions, including  
45 romantic activities.

46 **Methods:** We conducted an internet-based prospective cohort study from December 2020  
47 (baseline) to December 2021, using self-administered questionnaires. Briefly, 27,036 workers  
48 completed the questionnaires at baseline, and when followed up after one year, 18,560  
49 (68.7%) participated. A total of 6,486 non-married individuals with no romantic relationship  
50 at baseline were included in the analysis. At baseline they were asked about the  
51 implementation of infection control measures in the workplace, and at follow-up they were  
52 asked about activities they performed with a view to romantic relationships during the period  
53 from baseline to follow-up.

54 **Results:** Compared to workers in workplaces with no infection control measures, the OR  
55 associated with romance-related activities for those in workplaces with seven or more  
56 infection control measures was 1.90 (95% CI: 1.45-2.48,  $p < 0.001$ ), and the OR associated  
57 with having a new romantic partner was 1.79 (95% CI: 1.20-2.66,  $p = 0.004$ ).

58 **Conclusions:** Under the COVID-19 pandemic, the implementation of infection control  
59 measures in the workplace and the expressed satisfaction with those measures promoted  
60 romantic relationships among non-married, single individuals.

61 **Keywords:** COVID-19; longitudinal studies; spouses; workplace safety; single person

62

## 63 Introduction

64 Since it started in 2020, the global COVID-19 pandemic has drastically changed  
65 people's daily lives and work styles. As an infection prevention measure, it was  
66 recommended that people refrain from or limit normal social activities such as eating out and  
67 traveling, and respect physical distance from other people. In Japan, telecommuting was  
68 recommended because COVID-19 infections mainly occurred in people of working age, and  
69 reducing human contact was deemed important for preventing the spread of infection.<sup>1</sup>  
70 Consequently, whereas 20% of companies in Japan used telecommuting before the COVID-  
71 19 pandemic, this figure rose to 57% after the pandemic occurred.<sup>2</sup>

72 Loneliness is an emerging public health issue resulting from the COVID-19 pandemic  
73 situation.<sup>3,4</sup> Recommendations for physical distance and restrictions on social activity have  
74 reduced opportunities for people to interact. In particular, young people, people who are  
75 separated or divorced, and those with health issues have reported feeling more lonely during  
76 the pandemic.<sup>4</sup> Loneliness is associated with reduced quality of life, physical health, and  
77 mental health.<sup>3-5</sup>

78 From a public health perspective, it is important that non-married people, a high-risk  
79 group for loneliness, are able to establish new romantic relationships, because spending time  
80 with family can alleviate loneliness and help maintain good mental well-being.<sup>6</sup> However, as  
81 physical distance is encouraged and social activities continue to be restricted for months or  
82 even longer, we considered that it was increasingly difficult for single people to find romantic  
83 partners. It is known that the COVID-19 pandemic has impacted romantic relationships in  
84 various ways.<sup>7,8</sup> However, little is known about factors and attributes that influence new  
85 romantic activities during the pandemic.

86 Infection control in the workplace, which is where workers spend most of their time  
87 and therefore a major place of human contact, has been reported to affect not only infection

88 prevention but also workers' mental well-being and performance.<sup>9-12</sup> COVID-19 measures  
89 taken by Japanese employees include refraining from going to work when sick, measuring  
90 their body temperature, disinfecting the workplace, and teleworking. However, the extent to  
91 which the various control measures are implemented varies with the size of the company, the  
92 type of work, and other factors.<sup>13</sup> Improved infection control measures in the workplace are  
93 expected to affect workers' perception of infection risk and influence their daily behavior and  
94 quality of life. Indeed, enhanced infection control measures in the workplace were also  
95 reported to be associated with individual preventive behaviors such as hand washing.<sup>10</sup>

96 We hypothesized that infection control efforts in the workplace also influence  
97 people's interactions, including romantic activities, during the COVID-19 pandemic. It is  
98 conceivable that during the pandemic, seeking a new romantic partner is influenced by one's  
99 perception of infection risk. Because people tend to spend more time with new romantic  
100 partners and have more physical contact with them, those with greater concerns about  
101 infection might be more likely to consider romantic behavior as an infection risk.  
102 Furthermore, infection control measures at work might influence the perception of infection  
103 risk, including in the context of romantic activities.

104 Here, we conducted a prospective cohort study to specifically examine whether better  
105 infection control in the workplace influences workers' behaviors related to romantic  
106 relationships.

## 107 **Methods**

108           The study was conducted under a prospective cohort design between December 2020  
109 and December 2021. Baseline and follow-up surveys were conducted using self-administered  
110 questionnaires via the Internet. All participants gave informed consent, and the study was  
111 approved by the ethics committee of the University of Occupational and Environmental  
112 Health, Japan (reference No. R2-079 and R3-006).

113           The protocol for the baseline survey has been described elsewhere.<sup>14</sup> The target  
114 population included workers aged 20 to 65 years and in employment at the time of the  
115 baseline survey. Sampling was conducted taking into account geographic region, occupation,  
116 and sex. Regions were divided into five levels, covering 47 prefectures, according to the level  
117 of COVID-19 infection. Occupations were divided into office workers and non-office  
118 workers. Thus, a total of 20 blocks of five regions, two occupations, and two sexes was  
119 created, and each block was sampled in equal numbers. We planned to collect data from  
120 30,000 people overall, aiming to reach at least 1,500 participants in each block.

121           The survey was commissioned to Cross Marketing Inc. (Tokyo, Japan). Of their 4.7  
122 million pre-registered monitors, approximately 600,000 were sent an email request to  
123 participate in the survey. Of these, 55,045 participated in the initial screening, with 33,302  
124 satisfying the final inclusion criteria. Of those 33,302 participants, 27,036 were included in  
125 the analysis, after excluding those judged as submitting untrustworthy responses. The  
126 following criteria were used to determine untrustworthy responses: extremely short response  
127 time ( $\leq 6$  minutes), reporting extremely low body weight ( $< 30$  kg), reporting extremely short  
128 height ( $< 140$  cm), inconsistent answers to similar questions throughout the survey (e.g.,  
129 inconsistency on questions about marital status and area of residence), and wrong answers to  
130 a question used solely to identify unreliable responses (“Choose the third largest number  
131 from the following five numbers.”).

132           The follow-up survey was conducted in December 2021, one year after baseline. A  
133 total of 18,560 (68.7%) participated in the follow-up. Finally, 6,486 individuals (2,779 men,  
134 3,707 women) who were not married and who were not in a romantic relationship at baseline  
135 were included in the analysis. As the study is an internet-based survey, there are no missing  
136 values.

137

### 138 **Evaluation of infection control measures in the workplace at baseline**

139           Participants were asked to answer yes or no concerning whether the following  
140 measures had been implemented in their workplace: refraining from and restrictions on  
141 business trips; refraining from receiving and restrictions on visitors; refraining from meeting  
142 or recommending a limit on the number of people at social gatherings and dinners; refraining  
143 from or limiting face-to-face internal meetings; wearing masks at all times during working  
144 hours; installing partitions and revising the workplace layout; recommending daily  
145 temperature checks at home; encouraging telecommuting; prohibiting eating at the work  
146 desk; and requesting employees not come to work if feeling unwell.

147           The questionnaire also asked participants to rate their company's infection control  
148 measures, using the question: "Do you think your company has taken adequate infection  
149 control measures for its employees?" Participants responded on a four-point scale: "yes,"  
150 "somewhat," "not really," "no."

151

### 152 **Assessment of romantic relationship status**

153           The subjects were asked about their activities in relation to developing romantic  
154 relationships during the period from baseline to follow-up (one year). Participants who  
155 answered yes to either of the two questions: "Have you taken any action in the past year to  
156 find a romantic partner?" "Have you engaged in any marriage activities in the past year?"

157 were classified as “taking action in a romantic relationship”. Those who answered "yes" to  
158 the question: "Have you been in a new romantic relationship in the past year?" were  
159 classified as “having a new romantic relationship”.

160

## 161 **Other covariates**

162 Information on the subject’s characteristics were collected at the baseline. Participants  
163 answered the following questions about themselves in an online form: age, sex, prefecture of  
164 residence, marital status (unmarried, bereaved/divorced), job type (mainly desk work, mainly  
165 involving interpersonal communication, and mainly labor), number of employees in the  
166 workplace, educational background, income, smoking status, and alcohol consumption (6–7  
167 days a week, 4–5 days a week, 2–3 days a week, less than 1 day a week, hardly ever).

168

## 169 **Statistical analyses**

170 Age-sex adjusted odds ratios (ORs) and multivariate adjusted ORs were estimated  
171 using a multilevel logistic model nested in the prefecture of residence to take account of  
172 regional variability. The ORs of the number of infection control measures in the workplace,  
173 and evaluation of those infection control measures associated with "taking action in a  
174 romantic relationship" were estimated. The model included age, sex, marital status, job type,  
175 income, education, self-rated health, smoking, alcohol drinking, number of employees in the  
176 workplace, number of workplace measures against COVID-19, and subjective assessment of  
177 whether the company’s infection control measures for employees were adequate. In addition,  
178 the incidence rate of COVID-19 by prefecture at baseline was used, and the ORs associated  
179 with "having a new romantic relationship" were also estimated.

180 A *p* value less than 0.05 was considered statistically significant. All analyses were  
181 conducted using Stata (Stata Statistical Software: Release 16; StataCorp LLC, TX, USA).



## 182 **Results**

183 Table 1 shows the baseline characteristics in relation to the number of infection  
184 control measures implemented in the workplace. In workplaces where no infection control  
185 measures were taken, 60% of the respondents were men. As the number of infection control  
186 measures increased, the percentage of women increased. Compared to workplaces with more  
187 infection control measures, workplaces with no infection control measures had lower  
188 incomes, more smokers, and were of smaller size.

189 Table 2 shows the ORs for the number of infection control measures and activities  
190 related to romantic relationships. Compared to workers in workplaces with no infection  
191 control measures, those in workplaces with seven or more measures were more likely to  
192 engage in romantic relationship-related activities (OR=1.84, 95% CI: 1.42-2.47,  $p<0.001$ ).  
193 The multivariate adjusted model also showed this association (OR=1.90, 95% CI: 1.45-2.48,  
194  $p<0.001$ ). We also found a linear relationship between the number of infection control  
195 measures and activities in a romantic relationship ( $p$  for trend  $< 0.001$ ).

196 Similarly, workers who perceived their company's infection control self-perception as  
197 adequate compared to those who considered it inadequate were more likely to engage in  
198 romantic relationship-related activities (OR=1.68, 95% CI:1.24-2.28,  $p=0.001$ ). This  
199 relationship was similar in the multivariate model (OR=1.55, 95% CI:1.13-2.12,  $p=0.007$ ).  
200 Furthermore, workers' perception of infection control in the workplace showed a linear  
201 relationship in the order of strongly disagree, disagree, agree, and strongly disagree ( $p$  for  
202 trend =0.003).

203 Table 3 shows the ORs of participants who actually established a romantic  
204 relationship during the period between baseline and follow-up. The more infection control  
205 measures were implemented in the workplace, the more people started to have new romantic  
206 relationships. In the multivariate analysis, the OR for those who reported seven or more

207 measures in the workplace compared to those who reported that no infection control  
208 measures existed was 1.79 (95% CI: 1.20-2.66,  $p=0.004$ ). There was also a linear  
209 relationship: the higher the number of measures, the greater the likelihood of starting a new  
210 romantic relationship ( $p$  for trend  $<0.001$ ). In addition, there was a nonsignificant tendency ( $p$   
211 for trend  $<0.081$ ) for those who felt that the level of infection control in the workplace was  
212 adequate to establish a new romantic relationship.  
213

## 214 Discussion

215 This study showed that greater implementation of infection control measures in the  
216 workplace is associated with more activities toward initiating romantic relationships.  
217 Furthermore, workers who expressed satisfaction with their company's infection control  
218 measures were more likely to be active in initiating a relationship than those who felt that  
219 their company's measures were inadequate. These results support the hypothesis that  
220 infection control efforts in the workplace influence workers' romantic activities during the  
221 COVID-19 pandemic.

222 Pietromonaco et al. proposed a conceptual framework for the impact of the COVID-  
223 19 pandemic on romantic relationships, based on the adaptive process from the perspective of  
224 relationship science.<sup>8</sup> The adaptive process involve interaction in which couples respond to  
225 external stressors and difficulties by mutually supporting each other and functioning through  
226 their problems.<sup>8,15</sup> When subjected to an external stressor, COVID-19 being a good example,  
227 couples that have existing problems will experience a decline in their relationship. The co-  
228 presence of emotional factors such as anxiety and depression also results in a lack of  
229 supportive affection when couples need to support each other, resulting in negative  
230 interactions.<sup>16,17</sup> A positive association between adequate infection control measures in the  
231 workplace and workers' mental health and anxiety has been reported.<sup>12</sup> Infection control in  
232 the workplace may have a moderating effect on workers' feelings of vulnerability by  
233 alleviating anxiety, and thereby positively influence within-couple relationships.

234 Adequate infection control measures in the workplace may act as a deterrent to self-  
235 regulatory depletion in workers and promote the initiation and construction of romantic  
236 relationships. The theory of self-regulatory depletion has been proposed as a mechanism by  
237 which external stress can lead to decreased cooperation and satisfaction among partners.<sup>18</sup>  
238 Because coping with external stress requires individual effort, it depletes self-regulatory

239 capacity, leading to more negative behavior toward partners and inhibiting dyadic  
240 relationships.<sup>15,18</sup> Couples experiencing increased daily stress may show more criticism of  
241 their partner, which has been attributed to self-regulation depletion.<sup>18</sup> In the COVID-19  
242 pandemic, various external stresses including economic problems, loneliness, employment  
243 instability, physical limitations, and limited social activities can make it difficult for couples  
244 to function in a complementary and supportive manner, and diminish romantic relationships.  
245 Working under a high perceived risk of infection can lead to negative attitudes toward one's  
246 partner or potential partner and a decline in the relationship, as one's self-regulatory capacity  
247 is depleted because of the effort required to avoid crisis. Adequate infection control measures  
248 in the workplace can alleviate the external stress and anxiety that COVID-19 brings to  
249 couples, including the anxiety that infection may be introduced to couples and families; they  
250 can help maintain good dyadic adjustment and psychological well-being, and thereby the  
251 quality of the relationship.

252 We chose socioeconomic factors related to marriage as confounding factors in this  
253 study because romantic activities are in some ways similar to those of marriage, albeit that  
254 the sociodemographic drivers of romantic activities are not clear. Even after adjusting for  
255 factors such as age, income, and health status, we found an association between workplace  
256 infection control and romantic activity. This result implies that the mechanisms underlying  
257 the association of adequate workplace infection control with romantic activity may depend on  
258 factors other than socioeconomic ones. It has been reported that infection control in the  
259 workplace is associated with workers' risk perception, individual preventive behavior, mental  
260 health, and stress.<sup>10,12,19</sup> It seems likely that these factors can either promote or retard the  
261 intention to engage in romantic behavior. Nevertheless, this question warrants further  
262 examination.

263           Some limitations of this study can be mentioned. First, although we assessed romantic  
264 activities using self-reports, there is little reason to doubt participants' recollections about  
265 whether or not they started a romantic relationship. Also, as the study involved an anonymous  
266 survey via the Internet, there was little motivation for false reporting. Second, our operational  
267 definition of romantic activity might be questioned. The presence or absence of a sexual  
268 relationship, homosexuality, or multiple partners are unknown. However, we believe that any  
269 impact of not distinguishing between these factors was minimal in the context of this study.  
270 Third, it is not clear how participants found their romantic partners, whether at parties, or by  
271 social networking applications, for example. It is possible that social networking activities  
272 have become more prevalent during the COVID-19 pandemic,<sup>20-22</sup> but any impact on this  
273 study remains unknown.

274           In conclusion, under the COVID-19 pandemic, implementation of infection control  
275 measures in the workplace and the degree of satisfaction with these measures promoted  
276 romantic relationships among non-married individuals who did not have a romantic partner.  
277 We propose that infection control measures at work facilitate romantic activities and the  
278 establishment of romantic relationships by alleviating anxiety and supplementing self-  
279 regulatory capacity depleted due to the external stress of COVID-19. Single people are at  
280 high risk for loneliness, and the latter has intensified during the COVID-19 pandemic.  
281 Meeting and establishing a relationship with a romantic partner may be an important factor in  
282 maintaining mental well-being, for as long as physical distancing continues to be  
283 recommended.

## 284 **Acknowledgements**

285           The authors declare they have no conflict of interest with respect to this study and  
286 article.

287           The study was supported and partly funded by a research grant from the University of  
288 Occupational and Environmental Health, Japan (no grant number); Japanese Ministry of  
289 Health, Labour and Welfare (H30-josei-ippan-002, H30-roudou-ippan-007, 19JA1004,  
290 20JA1006, 210301-1, and 20HB1004); Anshin Zaidan (no grant number), the Collabo-Health  
291 Study Group (no grant number), and Hitachi Systems, Ltd. (no grant number) and scholarship  
292 donations from Chugai Pharmaceutical Co., Ltd. (no grant number). The funder was not  
293 involved in the study design, collection, analysis, interpretation of data, the writing of this  
294 article or the decision to submit it for publication.

295           The current members of the CORoNaWork Project, in alphabetical order, are as  
296 follows Dr. Hajime Ando, Dr. Hisashi Eguchi, Dr. Yoshihisa Fujino (present chairperson of  
297 the study group), Dr. Arisa Harada, Dr. Ayako Hino, Dr. Kazunori Ikegami, Dr. Tomohiro  
298 Ishimaru, Dr. Kyoko Kitagawa, Ms. Ning Liu, Dr. Kosuke Mafune, Dr. Shinya Matsuda, Dr.  
299 Ryutaro Matsugaki, Dr. Koji Mori, Dr. Keiji Muramatsu, Dr. Masako Nagata, Dr. Tomohisa  
300 Nagata, Dr. Akira Ogami, Dr. Makoto Okawara, Dr. Rie Tanaka, Dr. Seiichiro Tateishi, Dr.  
301 Kei Tokutsu, and Dr. Mayumi Tsuji. All members are affiliated with the University of  
302 Occupational and Environmental Health, Japan.

303

## 304 **Data Availability**

305           Data cannot be shared for ethical reasons.

306

## 307 **References**

- 308 1. Ministry of health labour and welfare, Japan. Visualizing the data: information on  
309 COVID-19 infections. Accessed February 1, 2022. <https://covid19.mhlw.go.jp/en/>
- 310 2. Tokyo Metropolitan Government. [Results of a survey on telework adoption rates].  
311 Accessed February 1, 2022.  
312 <https://www.metro.tokyo.lg.jp/tosei/hodohappyo/press/2021/01/22/17.html>
- 313 3. Pai N, Vella SL. COVID-19 and loneliness: A rapid systematic review. *Aust N Z J*  
314 *Psychiatry*. 2021;55(12):1144-1156.
- 315 4. Groarke JM, Berry E, Graham-Wisener L, McKenna-Plumley PE, McGlinchey E,  
316 Armour C. Loneliness in the UK during the COVID-19 pandemic: Cross-sectional  
317 results from the COVID-19 Psychological Wellbeing Study. *PLoS ONE* .  
318 2020;15(9):e0239698.
- 319 5. Konno Y, Nagata M, Hino A, et al. Association between loneliness and psychological  
320 distress: A cross-sectional study among Japanese workers during the COVID-19  
321 pandemic. *Prev Med Rep*. 2021;24:101621.
- 322 6. Fujii R, Konno Y, Tateishi S, et al. Association between time spent with family and  
323 loneliness among Japanese workers during the COVID-19 pandemic: A cross-sectional  
324 study. *Front Psychiatry*. 2021;12:786400.
- 325 7. Weber DM, Wojda AK, Carrino EA, Baucom DH. Love in the time of COVID-19: A  
326 brief report on relationship and individual functioning among committed couples in the  
327 United States while under shelter-in-place orders. *Fam Process*. Published online July  
328 27, 2021. doi:10.1111/famp.12700

- 329 8. Pietromonaco PR, Overall NC. Applying relationship science to evaluate how the  
330 COVID-19 pandemic may impact couples' relationships. *Am Psychol.* 2020;76(3):438-  
331 450.
- 332 9. Sasaki N, Kuroda R, Tsuno K, Kawakami N. Workplace responses to COVID-19  
333 associated with mental health and work performance of employees in Japan. *J Occup*  
334 *Health.* 2020;62(1):e12134.
- 335 10. Kawasumi M, Nagata T, Ando H, et al. Association between preventive measures  
336 against workplace infection and preventive behavior against personal infection. *Ind*  
337 *Health.* Published online November 16, 2021. doi:10.2486/indhealth.2021-0162
- 338 11. Kurogi K, Ikegami K, Eguchi H, et al. A cross-sectional study on perceived workplace  
339 health support and health-related quality of life. *J Occup Health.* 2021;63(1):e12302.
- 340 12. Yasuda Y, Ishimaru T, Nagata M, et al. A cross-sectional study of infection control  
341 measures against COVID-19 and psychological distress among Japanese workers. *J*  
342 *Occup Health.* 2021;63(1):e12259.
- 343 13. Ishimaru T, Nagata M, Hino A, et al. Workplace measures against COVID-19 during the  
344 winter third wave in Japan: Company size-based differences. *J Occup Health.*  
345 2021;63(1):e12224.
- 346 14. Fujino Y, Ishimaru T, Eguchi H, et al. Protocol for a nationwide internet-based health  
347 survey of workers during the COVID-19 pandemic in 2020. *J UOEH.* 2021;43(2):217-  
348 225.
- 349 15. Karney BR, Bradbury TN. The longitudinal course of marital quality and stability: A  
350 review of theory, methods, and research. *Psychol Bull.* 1995;118(1):3-34.



- 351 16. Davila J, Bradbury TN, Cohan CL, Tochluk S. Marital functioning and depressive  
352 symptoms: Evidence for a stress generation model. *J Pers Soc Psychol.* 1997;73(4):849-  
353 861.
- 354 17. Beck LA, Pietromonaco PR, DeBuse CJ, Powers SI, Sayer AG. Spouses' attachment  
355 pairings predict neuroendocrine, behavioral, and psychological responses to marital  
356 conflict. *J Pers Soc Psychol.* 2013;105(3):388-424.
- 357 18. Buck AA, Neff LA. Stress spillover in early marriage: the role of self-regulatory  
358 depletion. *J Fam Psychol.* 2012;26(5):698-708.
- 359 19. Smith PM, Oudyk J, Potter G, Mustard C. Labour market attachment, workplace  
360 infection control procedures and mental health: A cross-sectional survey of Canadian  
361 non-healthcare workers during the COVID-19 pandemic. *Ann Work Expo Health.*  
362 2021;65(3):266-276.
- 363 20. Gibson AF. Exploring the impact of COVID-19 on mobile dating: Critical avenues for  
364 research. *Soc Personal Psychol Compass.* 2021;15(11):e12643.
- 365 21. Portolan L, McAlister J. Jagged love: Narratives of romance on dating apps during  
366 COVID-19. *Sex Cult.* Published online July 20, 2021:1-19.
- 367 22. Wiederhold BK. How COVID has changed online dating-and what lies ahead.  
368 *Cyberpsychol Behav Soc Netw.* 2021;24(7):435-436.

369

Table 1. Characteristics of subjects according to the number of workplace measures against COVID-19

|                                                                                                       | Number of workplace measures against COVID- 19 |               |               |                |
|-------------------------------------------------------------------------------------------------------|------------------------------------------------|---------------|---------------|----------------|
|                                                                                                       | 0<br>n=911                                     | 1-3<br>n=1383 | 4-6<br>n=1755 | 7-10<br>n=2437 |
| Age, mean (SD)                                                                                        | 47.8 (9.6)                                     | 46.2 (9.7)    | 45.0 (9.8)    | 45.4 (10.0)    |
| Sex, men                                                                                              | 548 (60.2%)                                    | 637 (46.1%)   | 691 (39.4%)   | 903 (37.1%)    |
| Marrital status                                                                                       |                                                |               |               |                |
| Divorce history                                                                                       | 176 (19.3%)                                    | 337 (24.4%)   | 381 (21.7%)   | 542 (22.2%)    |
| Never married                                                                                         | 735 (80.7%)                                    | 1046 (75.6%)  | 1374 (78.3%)  | 1895 (77.8%)   |
| Job type, mainly desk work                                                                            | 474 (52.0%)                                    | 629 (45.5%)   | 788 (44.9%)   | 1354 (55.6%)   |
| Income (million JPY)                                                                                  |                                                |               |               |                |
| <300                                                                                                  | 358 (39.3%)                                    | 441 (31.9%)   | 424 (24.2%)   | 446 (18.3%)    |
| 300-499                                                                                               | 278 (30.5%)                                    | 487 (35.2%)   | 641 (36.5%)   | 781 (32.0%)    |
| 500-799                                                                                               | 182 (20.0%)                                    | 293 (21.2%)   | 455 (25.9%)   | 727 (29.8%)    |
| >>800                                                                                                 | 93 (10.2%)                                     | 162 (11.7%)   | 235 (13.4%)   | 483 (19.8%)    |
| Education                                                                                             |                                                |               |               |                |
| Junior high school                                                                                    | 27 (3.0%)                                      | 36 (2.6%)     | 18 (1.0%)     | 29 (1.2%)      |
| High school                                                                                           | 321 (35.2%)                                    | 445 (32.2%)   | 465 (26.5%)   | 543 (22.3%)    |
| Vocational school/college,<br>university, graduate school                                             | 563 (61.8%)                                    | 902 (65.2%)   | 1272 (72.5%)  | 1865 (76.5%)   |
| Self-rated health                                                                                     |                                                |               |               |                |
| excellent                                                                                             | 38 (2.8%)                                      | 35 (3.7%)     | 62 (2.5%)     | 43 (2.5%)      |
| very good                                                                                             | 103 (7.6%)                                     | 73 (7.7%)     | 217 (8.9%)    | 151 (8.7%)     |
| good                                                                                                  | 424 (31.5%)                                    | 304 (32.1%)   | 766 (31.3%)   | 604 (34.6%)    |
| fair                                                                                                  | 536 (39.8%)                                    | 376 (39.7%)   | 1002 (40.9%)  | 706 (40.5%)    |
| poor                                                                                                  | 247 (18.3%)                                    | 158 (16.7%)   | 401 (16.4%)   | 240 (13.8%)    |
| Current smoker                                                                                        | 276 (30.3%)                                    | 371 (26.8%)   | 400 (22.8%)   | 503 (20.6%)    |
| Alcohol drinking                                                                                      |                                                |               |               |                |
| 6-7 days per week                                                                                     | 182 (20.0%)                                    | 250 (18.1%)   | 243 (13.8%)   | 360 (14.8%)    |
| 4-5 days per week                                                                                     | 45 (4.9%)                                      | 84 (6.1%)     | 100 (5.7%)    | 155 (6.4%)     |
| 2-3 days per week                                                                                     | 94 (10.3%)                                     | 139 (10.1%)   | 215 (12.3%)   | 247 (10.1%)    |
| Less than 1 day per week                                                                              | 130 (14.3%)                                    | 234 (16.9%)   | 328 (18.7%)   | 461 (18.9%)    |
| Hardly ever                                                                                           | 460 (50.5%)                                    | 676 (48.9%)   | 869 (49.5%)   | 1214 (49.8%)   |
| Number of employees in the<br>workplace                                                               |                                                |               |               |                |
| 1-4                                                                                                   | 511 (56.1%)                                    | 398 (28.8%)   | 227 (12.9%)   | 178 (7.3%)     |
| 5-49                                                                                                  | 212 (23.3%)                                    | 499 (36.1%)   | 485 (27.6%)   | 315 (12.9%)    |
| 50-499                                                                                                | 109 (12.0%)                                    | 331 (23.9%)   | 556 (31.7%)   | 817 (33.5%)    |
| >>500                                                                                                 | 79 (8.7%)                                      | 155 (11.2%)   | 487 (27.7%)   | 1127 (46.2%)   |
| “Do you think your company<br>has taken adequate infection<br>control measures for its<br>employees?” |                                                |               |               |                |
| Yes                                                                                                   | 79 (8.7%)                                      | 113 (8.2%)    | 227 (12.9%)   | 560 (23.0%)    |
| Somewhat                                                                                              | 314 (34.5%)                                    | 659 (47.7%)   | 1036 (59.0%)  | 1501 (61.6%)   |
| Not really                                                                                            | 221 (24.3%)                                    | 367 (26.5%)   | 362 (20.6%)   | 292 (12.0%)    |
| No                                                                                                    | 297 (32.6%)                                    | 244 (17.6%)   | 130 (7.4%)    | 84 (3.4%)      |
| New romantic relationships                                                                            | 70 (7.7%)                                      | 160 (11.6%)   | 239 (13.6%)   | 364 (14.9%)    |

Table 2. Association between number of workplace measures against COVID-19 and activities in a new romantic relationship

|                                                                                | age-adjusted |           |                     | multivariate* |           |                     |
|--------------------------------------------------------------------------------|--------------|-----------|---------------------|---------------|-----------|---------------------|
|                                                                                | OR           | 95% CI    | p                   | OR            | 95% CI    | p                   |
| Number of workplace measures against COVID-19                                  |              |           |                     |               |           |                     |
| 0                                                                              | reference    |           |                     | reference     |           |                     |
| 1-3                                                                            | 1.46         | 1.08 1.97 | 0.015               | 1.43          | 1.07 1.90 | 0.016               |
| 4-6                                                                            | 1.63         | 1.22 2.17 | 0.001               | 1.53          | 1.19 1.97 | 0.001               |
| 7-10                                                                           | 1.87         | 1.42 2.47 | <0.001              | 1.90          | 1.45 2.48 | <0.001              |
|                                                                                |              |           | <0.001 <sup>†</sup> |               |           | <0.001 <sup>†</sup> |
| My company has adequate infection control measures in place for its employees. |              |           |                     |               |           |                     |
| Strongly disagree                                                              | reference    |           |                     | reference     |           |                     |
| Disagree                                                                       | 1.15         | 0.85 1.56 | 0.362               | 1.12          | 0.82 1.53 | 0.481               |
| Agree                                                                          | 1.28         | 0.98 1.68 | 0.069               | 1.25          | 0.95 1.65 | 0.116               |
| Strongly agree                                                                 | 1.68         | 1.24 2.28 | 0.001               | 1.55          | 1.13 2.12 | 0.007               |
|                                                                                |              |           | <0.001 <sup>†</sup> |               |           | 0.003 <sup>†</sup>  |

\* The model included age, sex, marital status, job type, income, education, self-rated health, smoking, alcohol drinking, number of employees in the workplace, number of workplace measures against COVID-19, and subjective assessment of whether the company has adequate infection control measures in place for employees.

<sup>†</sup> p for trend

Table 3. Association between number of workplace measures against COVID-19 and having a new romantic relationship

|                                                                                | age-adjusted |           |                     | multivariate* |           |                     |
|--------------------------------------------------------------------------------|--------------|-----------|---------------------|---------------|-----------|---------------------|
|                                                                                | OR           | 95% CI    | p                   | OR            | 95% CI    | p                   |
| Number of workplace measures against COVID-19                                  |              |           |                     |               |           |                     |
| 0                                                                              | reference    |           |                     | reference     |           |                     |
| 1-3                                                                            | 1.22         | 0.82 1.83 | 0.327               | 1.11          | 0.73 1.67 | 0.631               |
| 4-6                                                                            | 1.25         | 0.85 1.83 | 0.265               | 1.15          | 0.76 1.72 | 0.511               |
| 7-10                                                                           | 1.84         | 1.28 2.64 | 0.001               | 1.79          | 1.20 2.66 | 0.004               |
|                                                                                |              |           | <0.001 <sup>†</sup> |               |           | <0.001 <sup>†</sup> |
| My company has adequate infection control measures in place for its employees. |              |           |                     |               |           |                     |
| Strongly disagree                                                              | reference    |           |                     | reference     |           |                     |
| Disagree                                                                       | 1.36         | 0.89 2.06 | 0.156               | 1.30          | 0.85 2.00 | 0.224               |
| Agree                                                                          | 1.40         | 0.96 2.05 | 0.079               | 1.32          | 0.90 1.95 | 0.156               |
| Strongly agree                                                                 | 1.78         | 1.16 2.71 | 0.008               | 1.53          | 0.99 2.36 | 0.057               |
|                                                                                |              |           | 0.011 <sup>†</sup>  |               |           | 0.081 <sup>†</sup>  |

\* The model included age, sex, marital status, job type, income, education, self-rated health, smoking, alcohol drinking, number of employees in the workplace, number of workplace measures against COVID-19, and subjective assessment of whether the company has adequate infection control measures in place for employees.

<sup>†</sup> p for trend
